# Supplementary material
Source: PubMed Central journal article supplement (PMC9793313)
Supplement: mmc1.pdf [file mmc1.pdf]

iScience, Volume 26

## **Supplemental information**

### **Early alveolar epithelial cell necrosis is a potential driver of COVID-19-induced acute respiratory distress syndrome**

**Kentaro Tojo, Natsuhiko Yamamoto, Nao Tamada, Takahiro Mihara, Miyo Abe, Mototsugu Nishii, Ichiro Takeuchi, and Takahisa Goto**

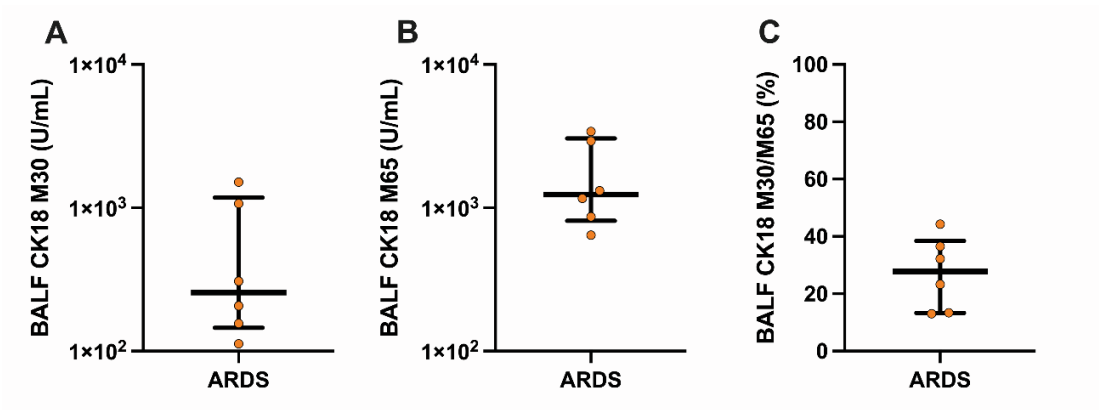

**Figure S1. Levels of epithelial cell death markers in BALF samples, Related to Figure 2.**

Levels of (A) CK18-M30, an epithelial apoptosis marker; (B) CK18-M65, an epithelial total cell death marker; (C) CK18-M30/M65 ratio, an indicator of the fraction of epithelial cells undergoing apoptosis versus all types of cell death in BALF samples of COVID-19 patients with ARDS

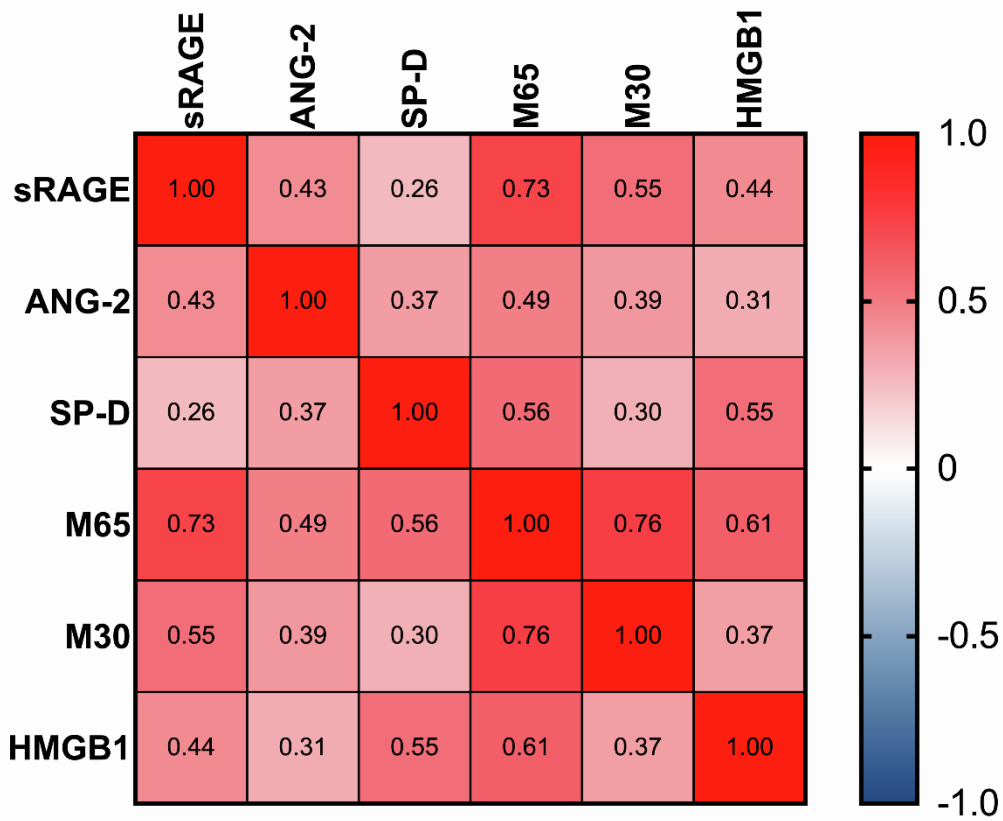

**Figure S2. Pearson correlation coefficients among circulating markers, Related to Figure 1 and 2.** The serum levels of each marker were log-transformed and then Pearson's correlation analyses were performed.

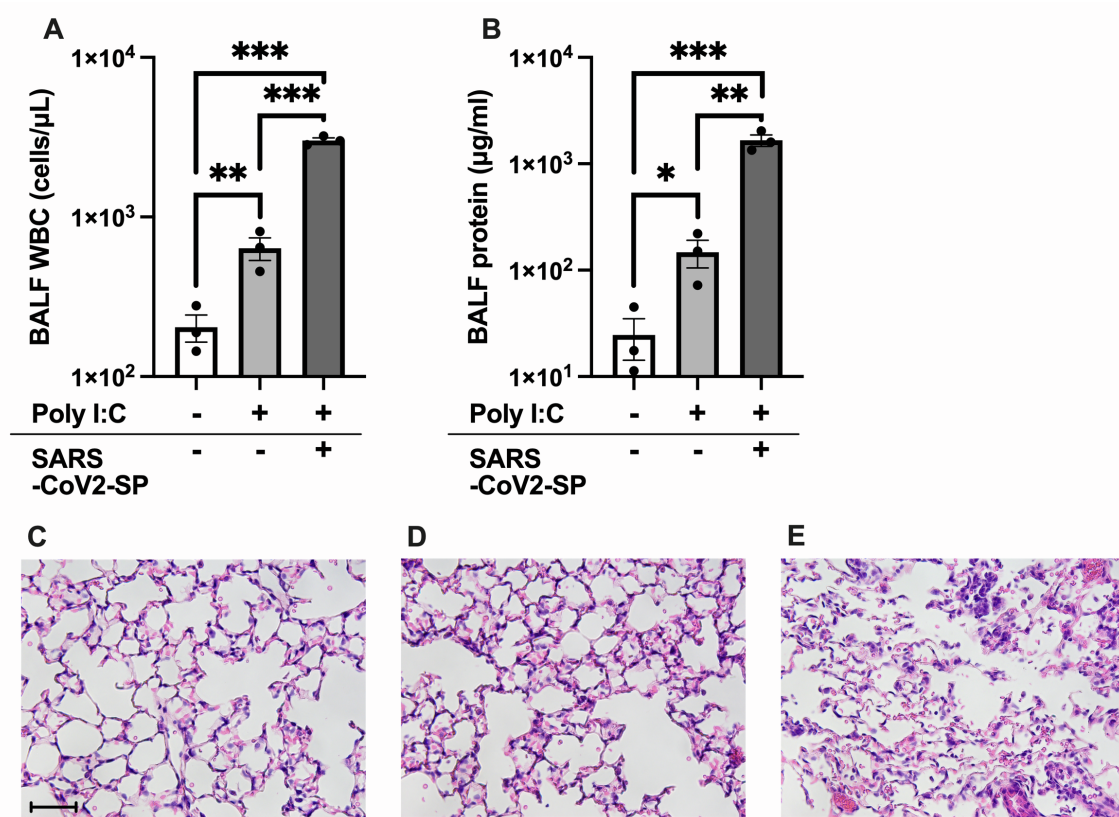

**Figure S3. Effects of intratracheal administration of the severe acute respiratory syndrome coronavirus 2 (SARS-CoV-2) spike protein combined with polyinosinic:polycytidylic acid (poly (I:C)), Related to Figure 3.** Levels of (A) white blood counts and (B) total proteins in the bronchoalveolar lavage fluid of mice intratracheally injected with phosphate buffered saline, poly (I:C) or SARS-CoV-2 spike proteins combined with poly (I:C) are shown. (C) Representative images of lung tissue sections stained with hematoxylin and eosin. Scale Bar = 50μm. The values are presented as means ± standard error. \*p<0.05, \*\*p<0.01, \*\*\*p<0.0001



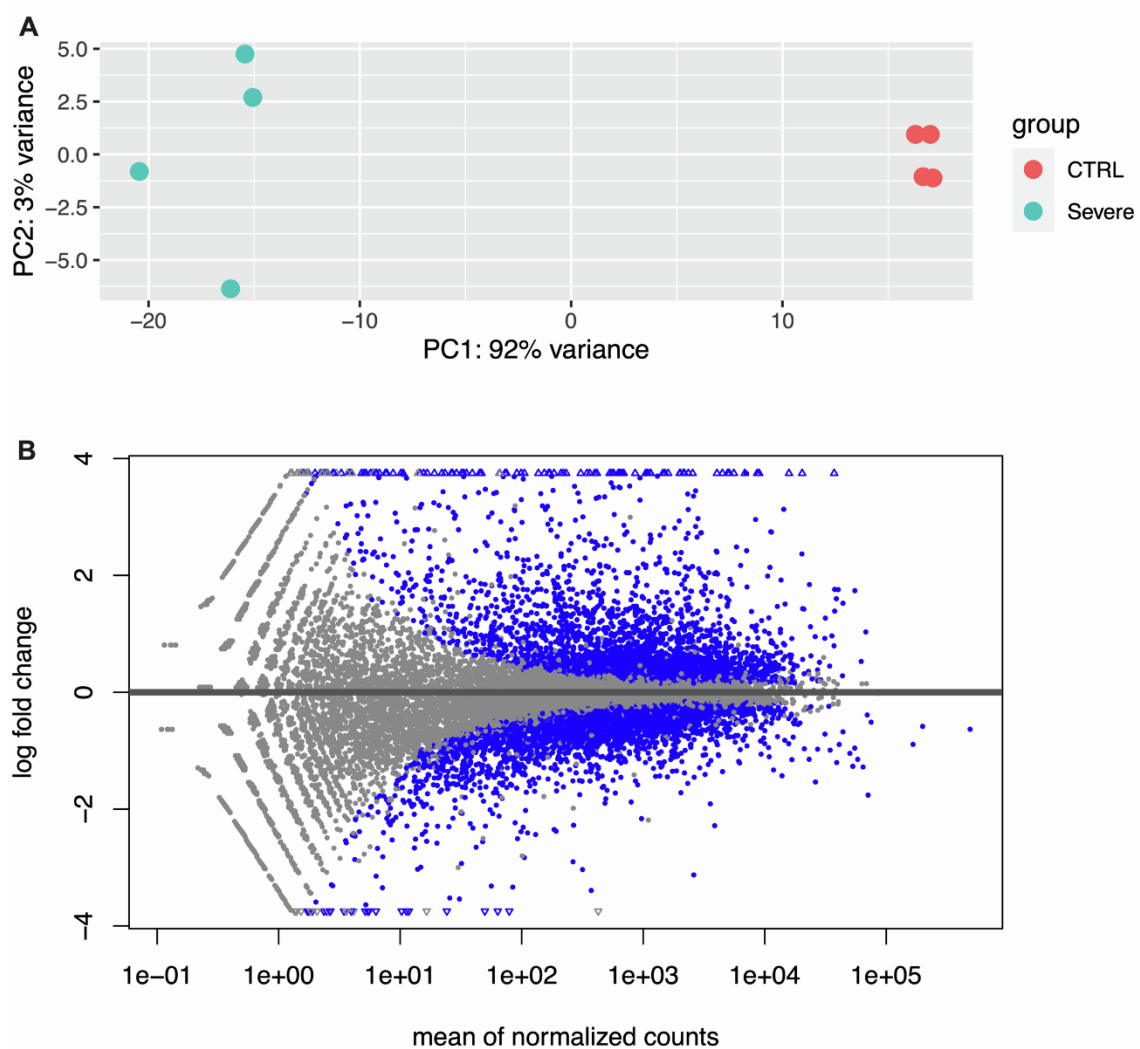

**Figure S4. Analysis of RNA-seq data of the COVID-19 model using SARS-CoV-2 spike protein and poly (I:C) in the present study, Related to Figure 4. (A) Principal component analysis and (B) MA-plot comparing the severe COVID-19 model and the control**

REACTOME\_INTERLEUKIN\_1\_FAMILY\_SIGNALING

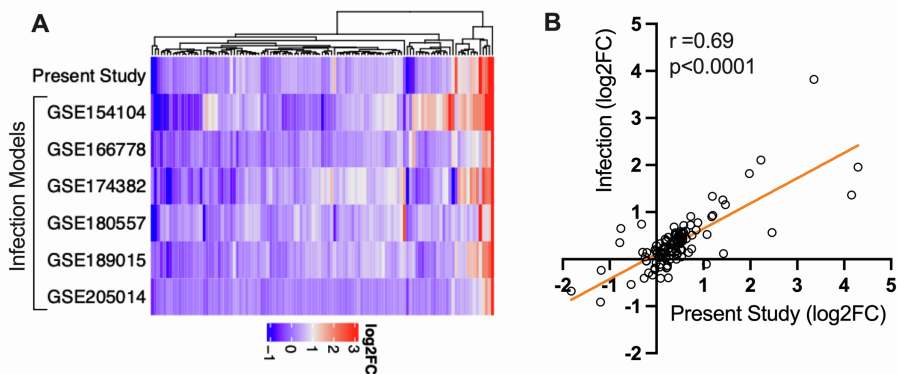

REACTOME\_INTERFERON\_SIGNALING

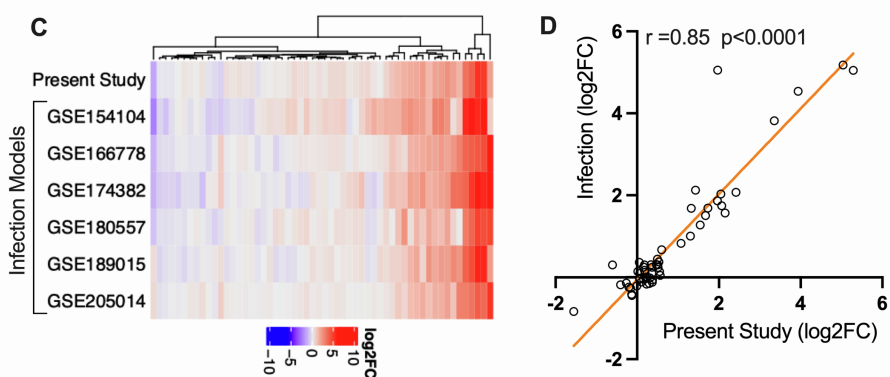

REACTOME\_TNFR2\_NON\_CANONICAL\_NF\_KB\_PATHWAY

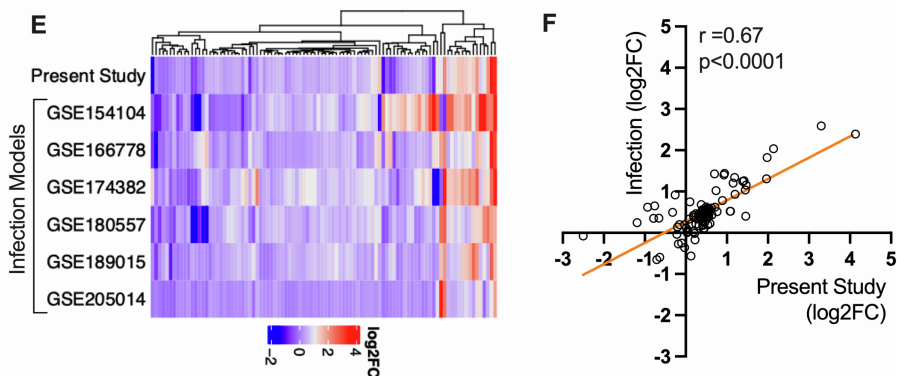

**Figure S5. Analysis of gene expression patterns in key inflammatory pathways, Related to Figure 4.** (A, B) Interleukin-1 family signaling, (C, D) interferon signaling, and (E, F) TNFR2 non-canonical NF $\kappa$ B pathways in the REACTOME database. Heatmaps of gene expression patterns (A, C, and E) and correlation analysis between the log<sub>2</sub> fold-changes in the present study model and mean log<sub>2</sub> fold-changes in the infection models (B, D, and F) are shown

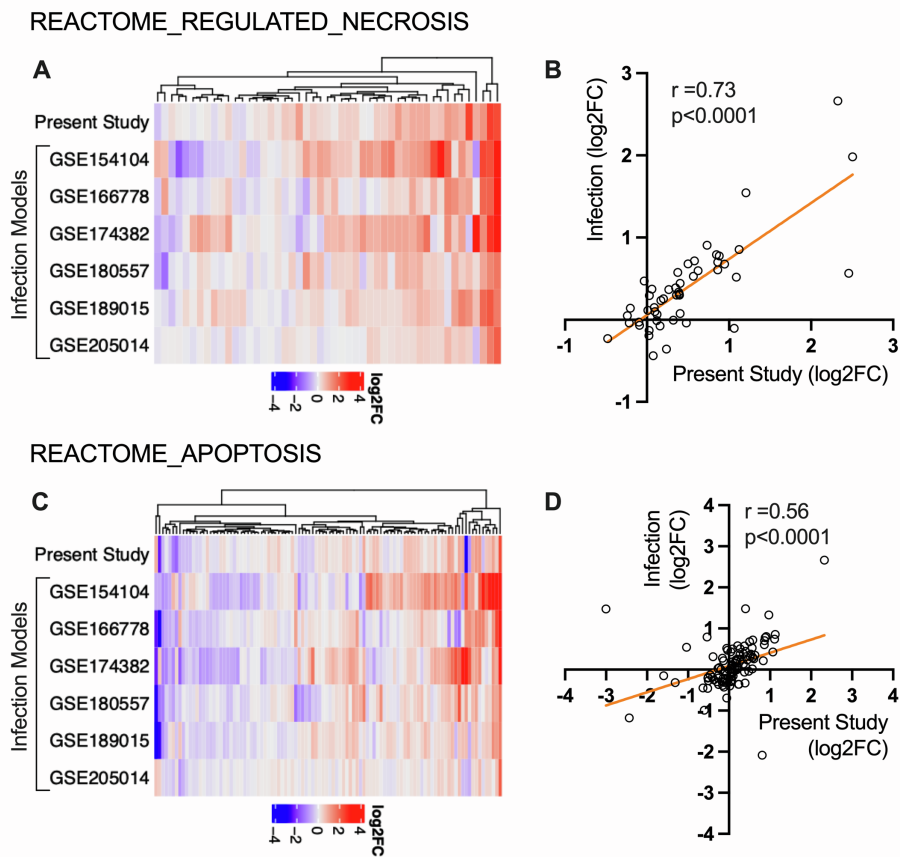

**Figure S6. Analysis of gene expression patterns in programmed cell death pathways, Related to Figure 4.** (A, B) Regulated necrosis, and (C, D) apoptosis pathways in the REACTOME database. Heatmaps of gene expression patterns (A and C) and correlation analysis between the log<sub>2</sub> fold-changes in the present study model and mean log<sub>2</sub> fold-changes in the infection models (B and D) are shown

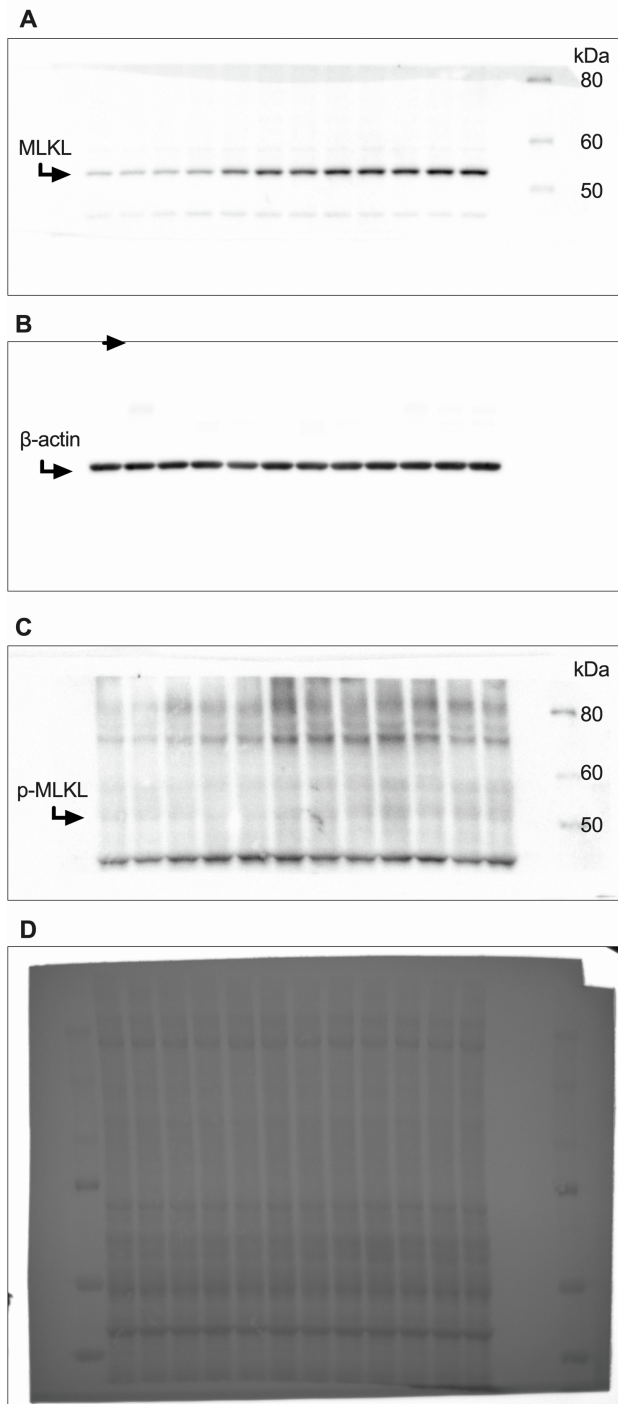

**Figure S7. Uncropped images of immunoblots of (A, B) mixed lineage kinase domain-like (MLKL) and (C, D) phosphorylated MLKL, Related to Figure 5.** Equality of protein loading was confirmed by (B) beta-actin staining (MLKL) after quenching horseradish peroxidase using hydrogen peroxide or (D) total protein staining (p-MLKL).

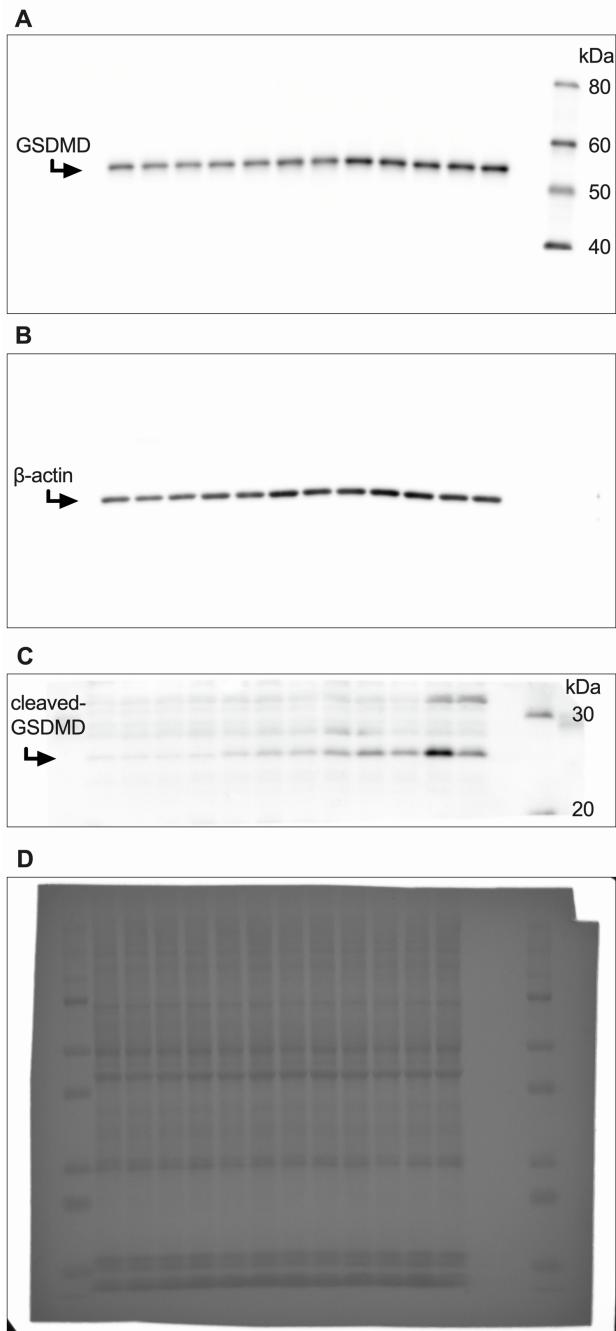

**Figure S8. Uncropped images of immunoblots of (A, B) gesdermin D (GSDMD) and (C, D) cleaved GSDMD, Related to Figure 5.** Equality of protein loading was confirmed by (B) beta-actin staining (GSDMD) after quenching horseradish peroxidase using hydrogen peroxide or (D) total protein staining (cleaved GSDMD).

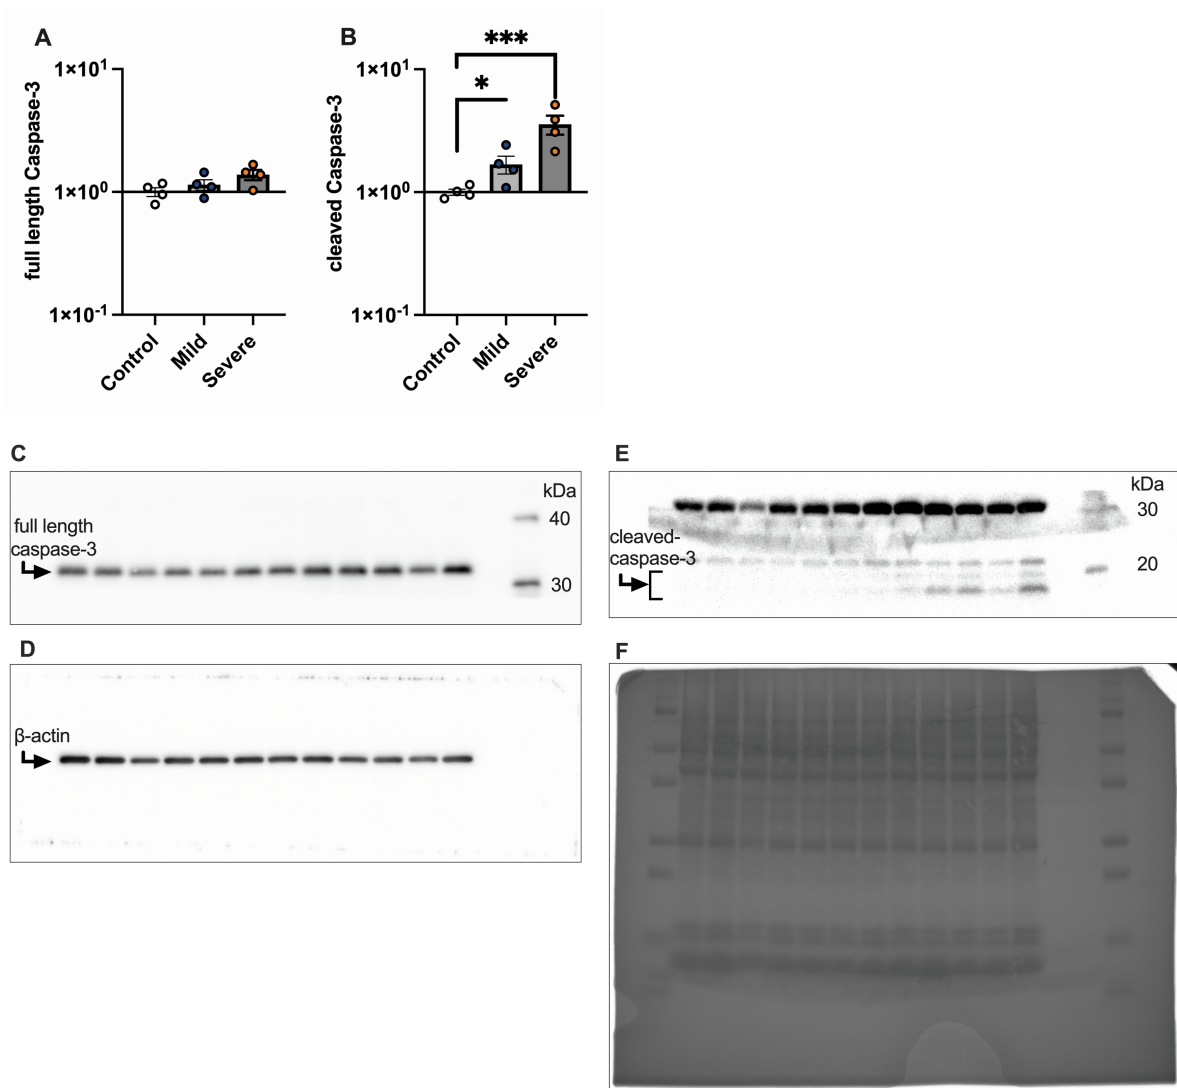

**Figure S9. Immunoblot analysis of full length and cleaved caspase-3, Related to Figure 5.**

(A, B) Densitometry and (C-F) uncropped images of full length and cleaved caspase-3 immunoblots of the protein extracted from the lung tissue of a COVID-19 mouse model. Equality of protein loading was confirmed by (D) beta-actin staining (full length caspase-3) after quenching horseradish peroxidase using hydrogen peroxide or (F) total protein staining (cleaved caspase-3).

|                                                                     |                     |
|---------------------------------------------------------------------|---------------------|
| <b>Age (years)</b>                                                  | 58 (55-71)          |
| <b>Males/Females</b>                                                | 5/1                 |
| <b>APACHE2 score</b>                                                | 14.0(10.0-15.5)     |
| <b>P/F ratio at admission</b>                                       | 154.5 (132.0-215.2) |
| <b>Mechanical ventilation use</b>                                   | 6 (100.0%)          |
| <b>In hospital mortality</b>                                        | 1 (16.7%)           |
| <b>Laboratory data on admission</b>                                 |                     |
| <b>WBC count (/<math>\mu</math>L)</b>                               | 8950 (3300-13700)   |
| <b>Lymphocyte count (/<math>\mu</math>L)</b>                        | 563 (435-916)       |
| <b>Platelet count (<math>\times 10^3</math>/ <math>\mu</math>L)</b> | 165.5 (110.3-195.0) |
| <b>D-dimer (<math>\mu</math>g/mL)</b>                               | 1.30(1.14-3.32)     |
| <b>CRP (mg/dL)</b>                                                  | 4.69 (3.73-17.12)   |
| <b>Creatinine (mg/dL)</b>                                           | 0.81 (0.57-4.23)    |
| <b>Total bilirubin (mg/dL)</b>                                      | 0.40 (0.28-0.45)    |

**Table S1. Clinical characteristics in ARDS patients (n=6) with COVID-19 whose BALF samples were collected, Related to Figure 2 and Figure S1.** Data are presented as count (%) or median (IQR).

| Accession Number                 | Strain    | Age        | Sex             | Disease Tissue                                         | Control Tissue                            |
|----------------------------------|-----------|------------|-----------------|--------------------------------------------------------|-------------------------------------------|
| GSE216644<br>(The Present Study) | C57BL/6J  | 8 weeks    | Male            | Instillation of SARS-CoV-2 spike protein and poly(I:C) | Instillation of Phosphate-buffered saline |
| GSE154104                        | K18-hACE2 | 8 weeks    | Male/<br>Female | SARS-CoV-2-infected lung                               | Non-infected lung                         |
| GSE166778                        | BALB/c    | 6 weeks    | Male            | Mouse-adapted SARS-CoV-2-infected lung                 | Non-infected lung                         |
| GSE174382                        | K18-hACE2 | 8-10 weeks | Male            | SARS-CoV-2-infected lung                               | Non-infected Lung                         |
| GSE180557                        | K18-hACE2 | 8-16 weeks | Male            | SARS-CoV-2-infected lung                               | Non-infected Lung                         |
| GSE189015                        | CD-1      | 8-10 weeks | Female          | SARS-CoV-2-infected lung                               | Non-infected Lung                         |
| GSE205014                        | K18-hACE2 | 9 weeks    | Female          | SARS-CoV-2-infected lung                               | Non-infected Lung                         |

**Table S2. Details of the mouse models of COVID-19 datasets, Related to Figure 4.**



|                        | <b>Present Data</b> | <b>GSE 154104</b> | <b>GSE 166778</b> | <b>GSE 174382</b> | <b>GSE 180557</b> | <b>GSE 189015</b> | <b>GSE 205014</b> |
|------------------------|---------------------|-------------------|-------------------|-------------------|-------------------|-------------------|-------------------|
| <b>Up DEGs</b>         | 3487                | 674               | 3145              | 4825              | 3219              | 1712              | 520               |
| <b>Dn DEGs</b>         | 3174                | 305               | 2976              | 4204              | 2910              | 1318              | 174               |
| <b>Overlapped DEGs</b> |                     |                   |                   |                   |                   |                   |                   |
| <b>Present Data</b>    |                     | 510<br>(14.0%)    | 1203<br>(22.2%)   | 1793<br>(27.5%)   | 1690<br>(33.7%)   | 837<br>(19.2%)    | 423<br>(11.8%)    |
| <b>GSE 154104</b>      | 154<br>(4.6%)       |                   | 388<br>(11.3%)    | 475<br>(9.5%)     | 445<br>(12.9%)    | 347<br>(17.0%)    | 259<br>(27.7%)    |
| <b>GSE 166778</b>      | 817<br>(15.3%)      | 136<br>(4.3%)     |                   | 1457<br>(22.4%)   | 929<br>(17.1%)    | 936<br>(23.9%)    | 316<br>(9.4%)     |
| <b>GSE 174382</b>      | 1361<br>(22.6%)     | 146<br>(3.3%)     | 1374<br>(23.7%)   |                   | 1433<br>(21.7%)   | 1240<br>(23.4%)   | 343<br>(6.9%)     |
| <b>GSE 180557</b>      | 1471<br>(31.9%)     | 156<br>(5.1%)     | 746<br>(14.5%)    | 1370<br>(23.9%)   |                   | 785<br>(18.9%)    | 365<br>(10.8%)    |
| <b>GSE 189015</b>      | 372<br>(9.0%)       | 46<br>(2.9%)      | 635<br>(17.4%)    | 782<br>(16.5%)    | 458<br>(12.1%)    |                   | 290<br>(14.9%)    |
| <b>GSE 205014</b>      | 96<br>(3.0%)        | 13<br>(2.8%)      | 40<br>(1.3%)      | 55<br>(1.3%)      | 55<br>(1.8%)      | 31<br>(2.1%)      |                   |

**Table S3. Overlap of differentially expressed genes (DEGs) among mouse COVID-19 models, Related to Figure 4.**
